# Supplementary material
Source: Royal Society of Chemistry journal article supplement (doi:10.1039/d6nr00422a)
Supplement: d6nr00422a1.pdf [file d6nr00422a1.pdf]

## Supporting Information

# Highly Ordered Pd/CeO<sub>x</sub> Inverse Opals for Alkaline Hydrogen Oxidation

Michael Wilms<sup>1,2</sup>, Arma Musa Yau<sup>1,2</sup>, Ruby Susan Raju<sup>1</sup>, Deya Sallaberry<sup>1</sup> and Mathilde Luneau<sup>1,2\*</sup>

<sup>1</sup>Department of Chemistry and Chemical Engineering, Chalmers University of Technology, Gothenburg 412 96, Sweden

<sup>2</sup>Competence Centre for Catalysis (KCK), Chalmers University of Technology, Gothenburg 412 96, Sweden

\*e-mail: [mathilde.luneau@chalmers.se](mailto:mathilde.luneau@chalmers.se)

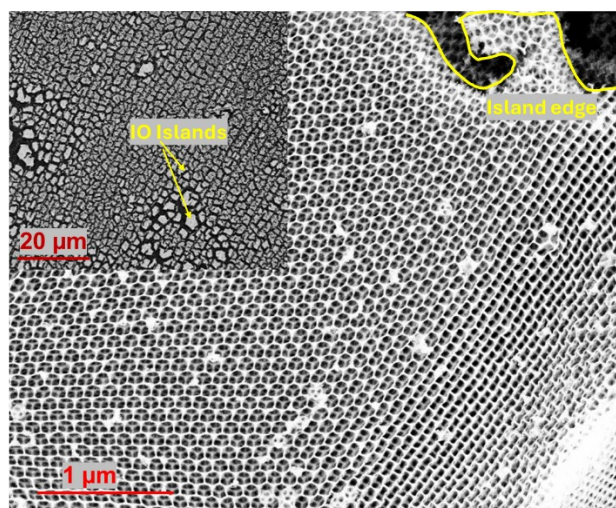

**Figure S 1.** SEM micrograph of inverse opal made using 510 nm polystyrene microspheres with high magnification (inset) image showing the “island formation” of the highly ordered IOs.

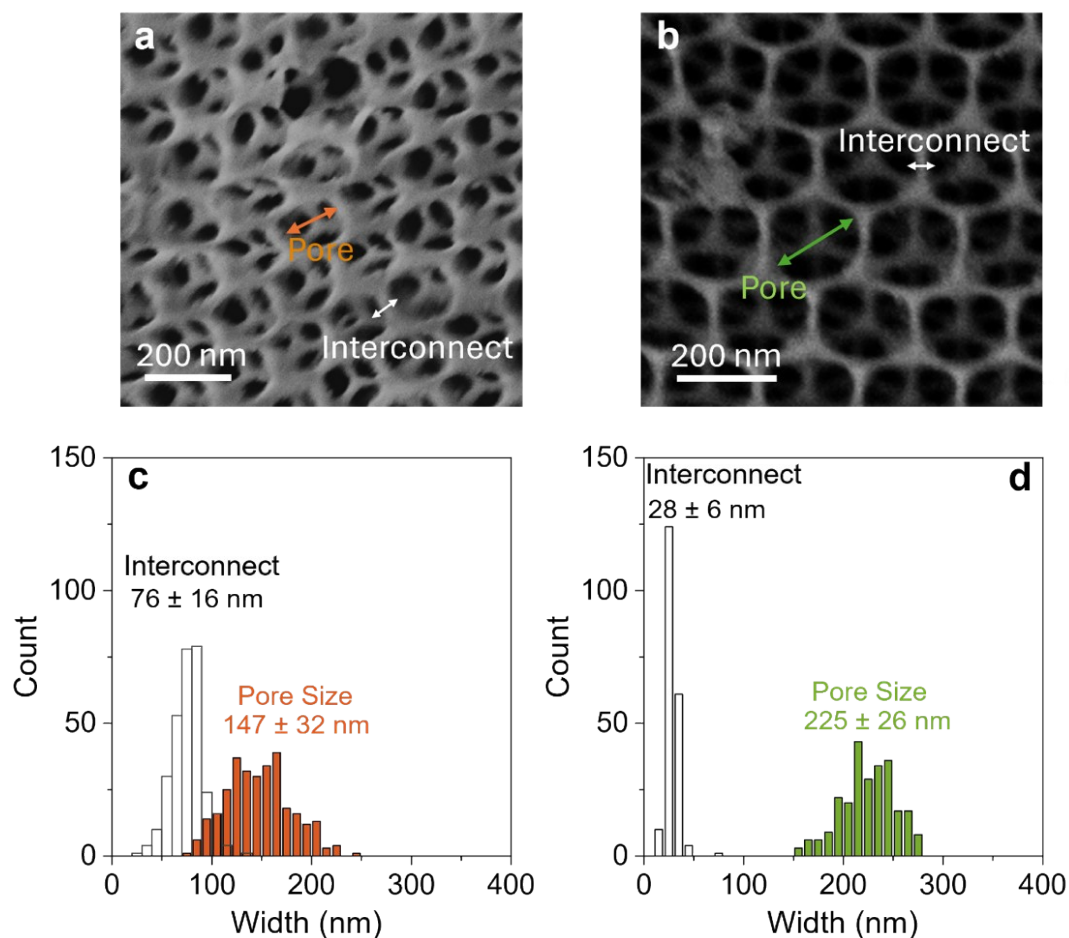

**Figure S 2.** (a, c) SEM micrograph of inverse opal made using 380 nm polystyrene microspheres indicating pore and backbone occurrences. (b, d) Histogram showing the measured pore size and backbone widths for 510 nm inverse opals. It was not possible to measure pore and backbone width distributions of the 104 nm IO due the pores being too small to accurately measure in SEM

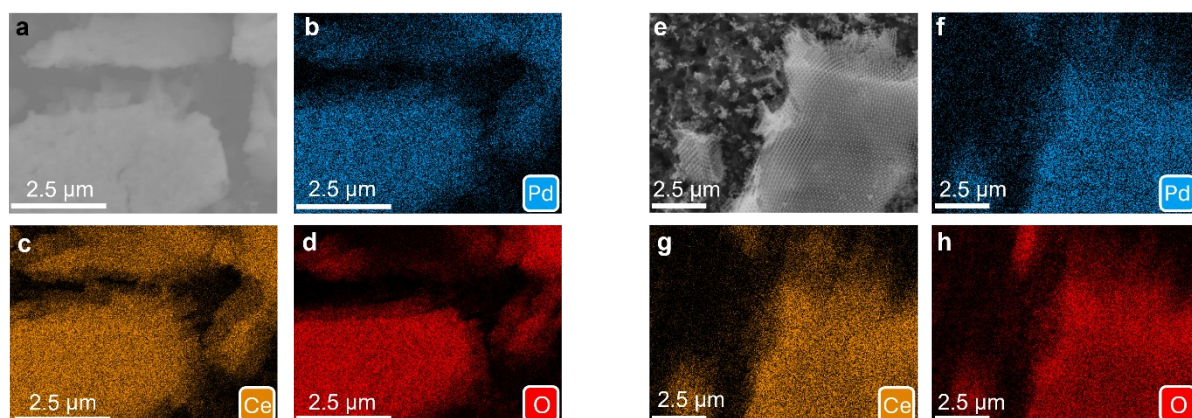

**Figure S 3.** SEM/EDX maps of (a-d) 104 nm (d-g) and 510 nm Pd/CeO<sub>x</sub> IO showing uniform distribution of Pd throughout the porous CeO<sub>x</sub> framework.

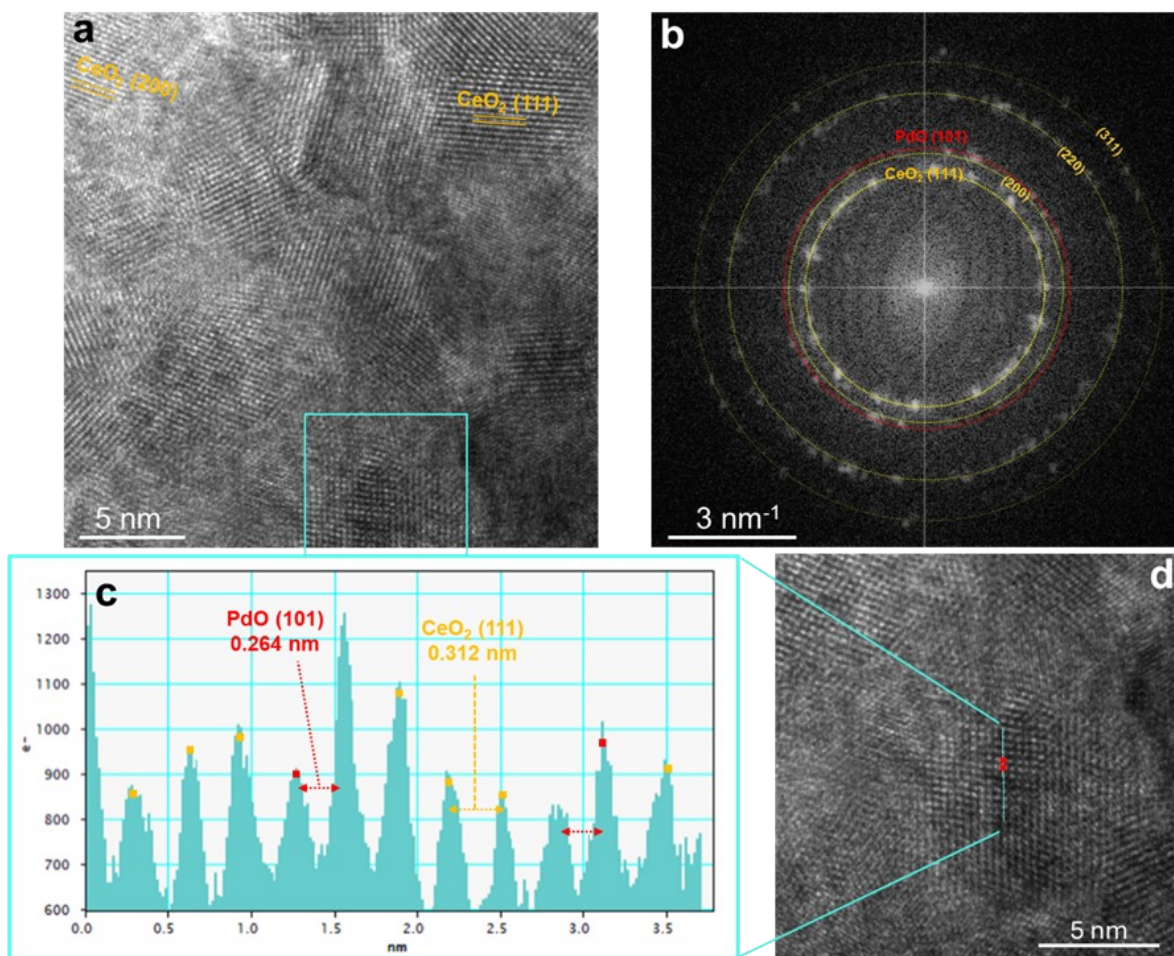

**Figure S 4.** (a) HR-TEM of Pd/CeO<sub>x</sub> 510 nm IO showing main lattice fringes of CeO<sub>x</sub> (111) and (200). (b) FFT analysis of lattice fringes in HR-TEM showing diffraction rings of CeO<sub>2</sub> and PdO. (c, d) HR-TEM lattice fringe analysis of CeO<sub>2</sub> crystallite (blue square) showing Pd substitution within CeO<sub>2</sub> (111) lattice plane.

**Table S 1.** Elemental weight percentages of various Pd/CeO<sub>x</sub> morphologies as determined by Energy-Dispersive X-ray Spectroscopy (EDX).

| Wt%          | No Opal      | 104 nm       | 380 nm       | 510 nm       |
|--------------|--------------|--------------|--------------|--------------|
| <b>Ce</b>    | 68.7         | 27.0         | 47.3         | 21.9         |
| <b>O</b>     | 17.8         | 18.4         | 19.5         | 16.1         |
| <b>Pd</b>    | 9.62         | 2.89         | 6.13         | 2.49         |
| <b>Pd/Ce</b> | <b>0.140</b> | <b>0.107</b> | <b>0.130</b> | <b>0.114</b> |

**Table S 2.** Surface composition, Pd3d peak positions and FWHM of Pd/CeO<sub>x</sub> IOs from XPS measurement and analysis.

| Morphology     | Pd Species | Percentage (%) | 3d <sub>5/2</sub> Position (eV) | 3d <sub>3/2</sub> Position (eV) | FWHM (eV) |
|----------------|------------|----------------|---------------------------------|---------------------------------|-----------|
| <b>No Opal</b> | Pd(0)      | -              | -                               | -                               | -         |
|                | PdO        | 81.89          | 336.30                          | 341.60                          | 1.60      |
|                | Pd-O-Ce    | 18.11          | 337.69                          | 342.99                          | 2.23      |
| <b>104 nm</b>  | Pd(0)      | -              | -                               | -                               | -         |
|                | PdO        | 51.85          | 335.93                          | 341.23                          | 1.60      |
|                | Pd-O-Ce    | 48.15          | 337.11                          | 342.41                          | 1.92      |
| <b>380 nm</b>  | Pd(0)      | 8.63           | 335.39                          | 341.25                          | 1.30      |
|                | PdO        | 64.39          | 335.99                          | 341.27                          | 1.60      |
|                | Pd-O-Ce    | 26.98          | 337.01                          | 342.04                          | 3.00      |
| <b>510 nm</b>  | Pd(0)      | 6.78           | 334.14                          | 339.44                          | 1.30      |
|                | PdO        | 55.20          | 335.94                          | 341.24                          | 1.60      |
|                | Pd-O-Ce    | 38.02          | 337.01                          | 342.31                          | 2.42      |

## Effect of Calcination Conditions on Pd/CeO<sub>x</sub> IOs

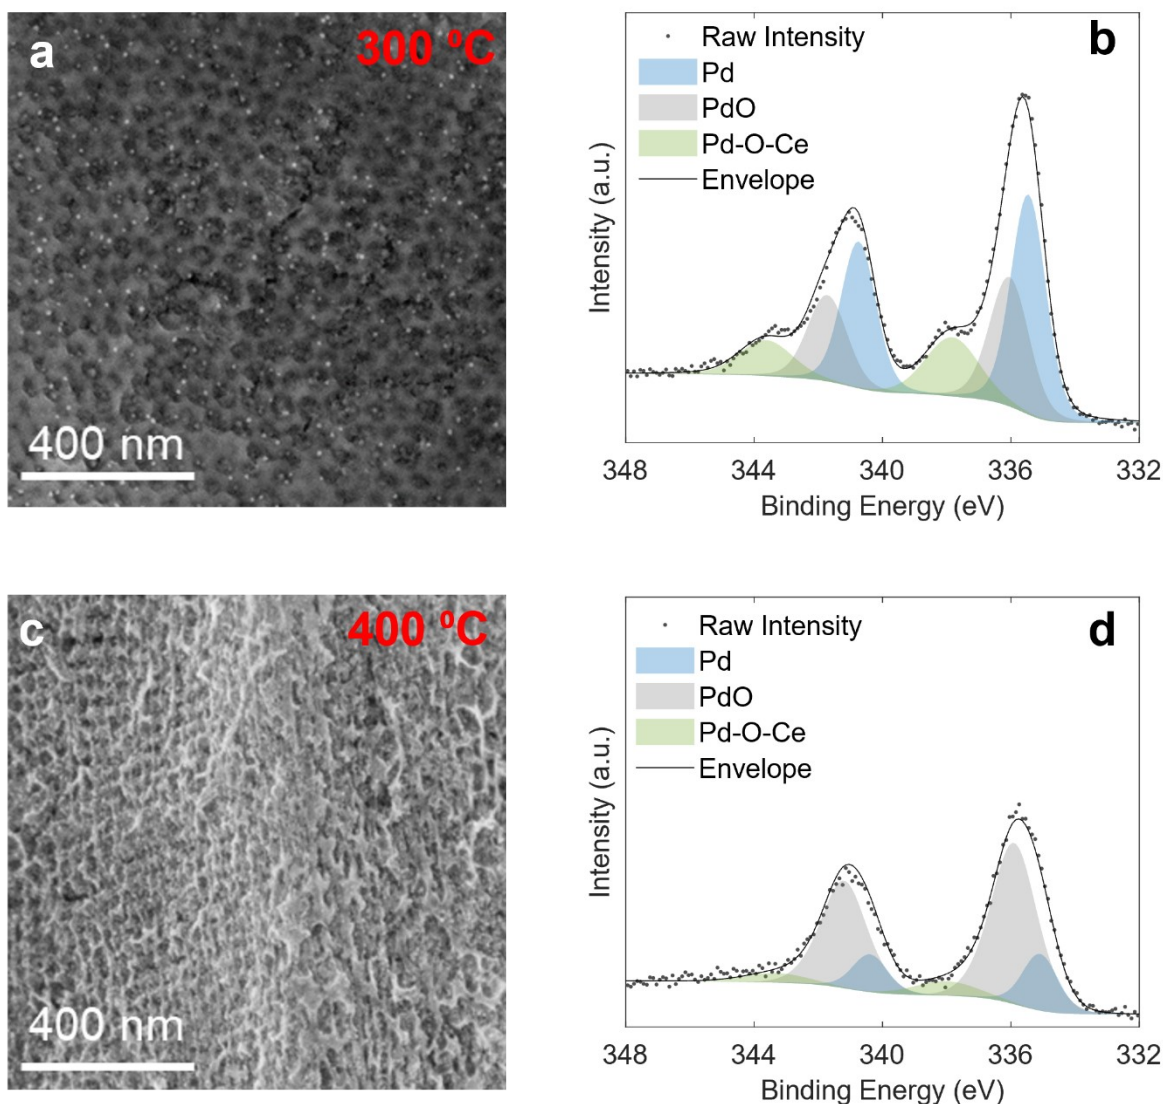

**Figure S 5.** (a, c) SEM micrograph of inverse opal made using 104 nm polystyrene microspheres calcined at different calcination temperatures using a ramp of 1 °C/min ramp and (b, d) corresponding XPS Pd3d spectra.

The calcination conditions of Pd/CeO<sub>x</sub> were found to heavily govern Pd dispersion and speciation in XPS. Calcination at 300 °C (1 °C/min ramp) resulted in the formation of visible Pd nanoparticles with average diameters of approximately 20 nm, which was corroborated by the presence of a metallic Pd component in the XPS Pd 3d spectrum (**Figure S5a, c**). Note, the slow heating ramp employed for these samples led to poor-quality inverse opal structures. While ramp speed likely had less influence on Pd dispersion, it clearly affected the resulting IO morphology. Increasing the calcination temperature to 400 °C led to the disappearance of the majority of the Pd nanoparticles, with XPS analysis indicating only a minor residual metallic phase. For the 500 °C calcination temperature utilized throughout this study, no Pd

nanoparticles were observed via SEM. In this case, metallic Pd was detected only in the 380 nm and 510 nm IO samples as a small minority species (<10%).

Samples annealed in Argon at 500 °C also formed Pd nanoparticles (~20 nm) with visible aggregation also observed (**Figure S 10**). This nanoparticle formation was corroborated by XPS analysis (**Figure S 13**), suggesting that an oxidative environment during calcination at >500 °C is critical for maintaining high Pd dispersion within the ceria framework.

## Electrochemical Measurements

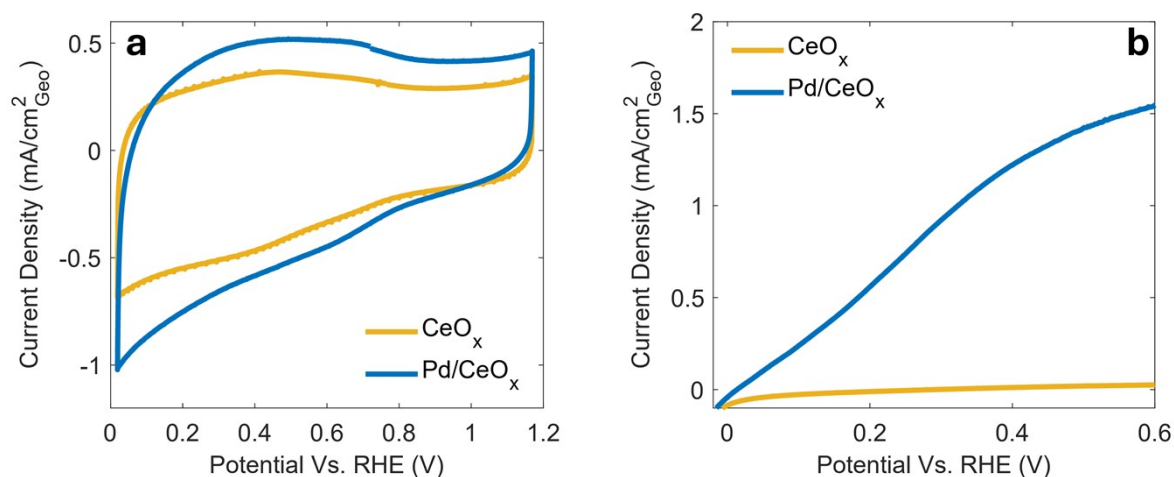

**Figure S 6.** (a) Cyclic voltammetry of  $\text{CeO}_x$  and  $\text{Pd/CeO}_x$  104 nm inverse opal at a scan rate of 100 mV/s and in argon atmosphere in 0.1 M KOH electrolyte. (b) Anodic HOR sweeps at a scan rate of 5 mV/s at a rotation speed of 1600 RPM in saturated  $\text{H}_2$  atmosphere in 0.1 M KOH electrolyte.

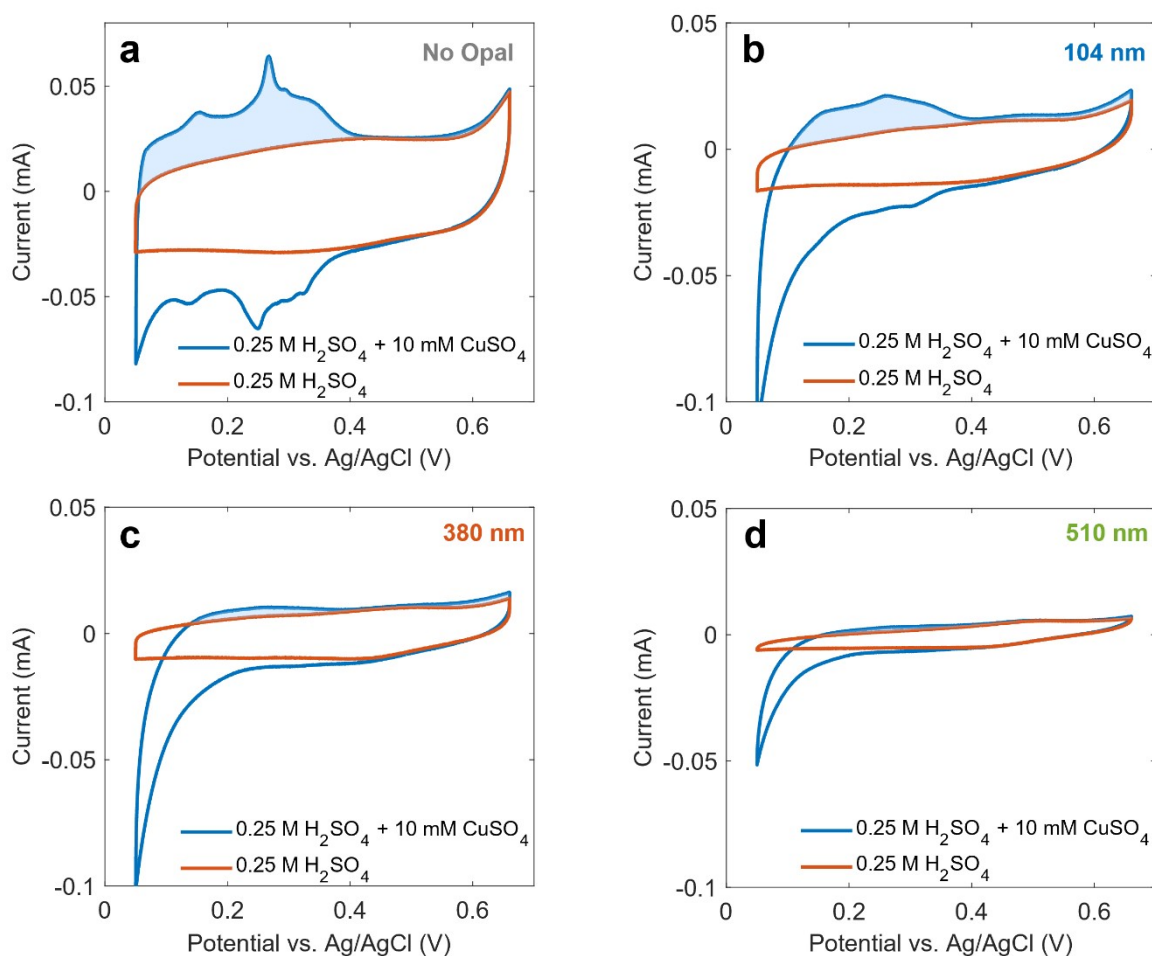

**Figure S 7 3.** Cu UPD scanning curves of different  $\text{Pd/CeO}_x$  samples, recorded at a scan rate of 10 mV/s in argon atmosphere.

**Table S 3.** Relative surface areas of IO electrodes estimated from capacitance in cyclic-voltammograms, assuming the geometric area of the non-templated (No opal) sample was  $0.196 \text{ cm}^2$ . The actual surface area of the no opal sample likely differed from the geometric area due to inherent surface roughness, therefore these values should be treated as relative estimates.

| Potential vs. RHE (V) | No opal | 104 nm | 380 nm | 510 nm |
|-----------------------|---------|--------|--------|--------|
| -0.4                  | 0.196   | 0.125  | 0.09   | 0.024  |
| 0.0                   | 0.196   | 0.106  | 0.09   | 0.024  |

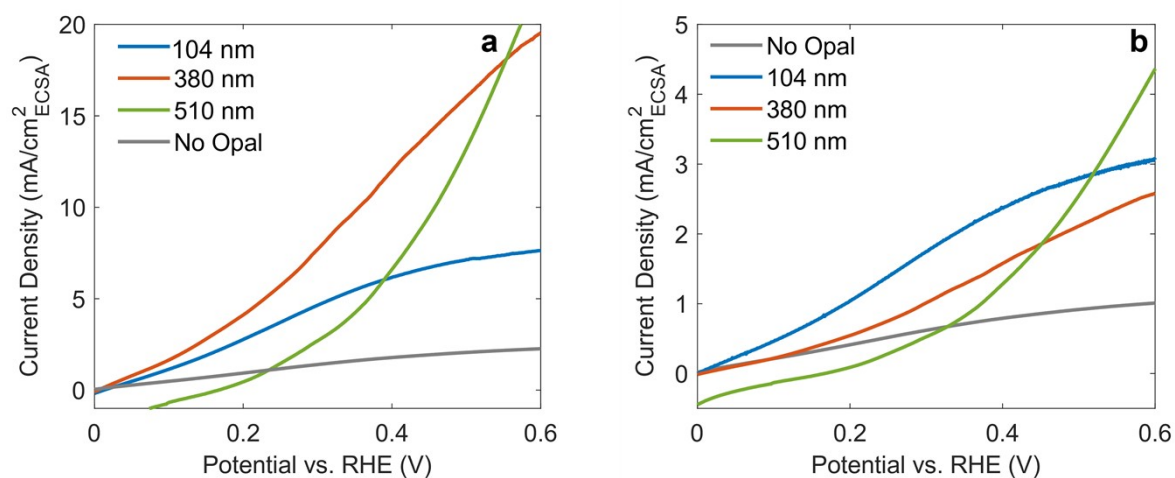

**Figure S 8.** ECSA Normalized HOR sweeps from (a) CuUPD and (b) cyclic voltammetry derived capacitance from samples shown in **Figure 4b**.

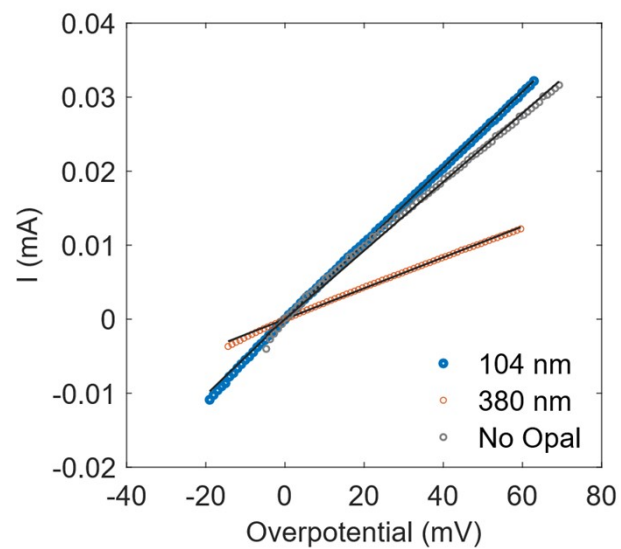

**Figure S 9.** HOR Micropolarization region of Pd/CeO<sub>x</sub> IOs to estimate exchange current densities ( $j_0$ ).

## Effect of Ar Annealing on Pd/CeO<sub>x</sub>

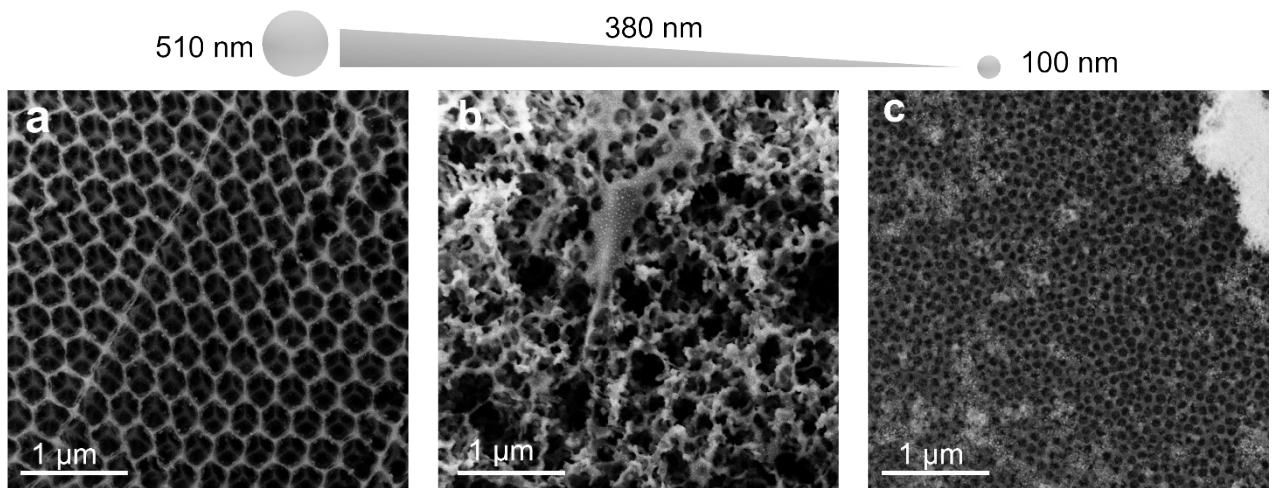

**Figure S 10.** Highly ordered Pd/CeO<sub>x</sub> inverse opals synthesized via template removal in argon as shown by SEM micrographs using polymer microsphere sizes of (a) 510 nm, (b) 330 nm and (c) 104 nm. The 380 nm IO is observed to have a more disordered pore network.

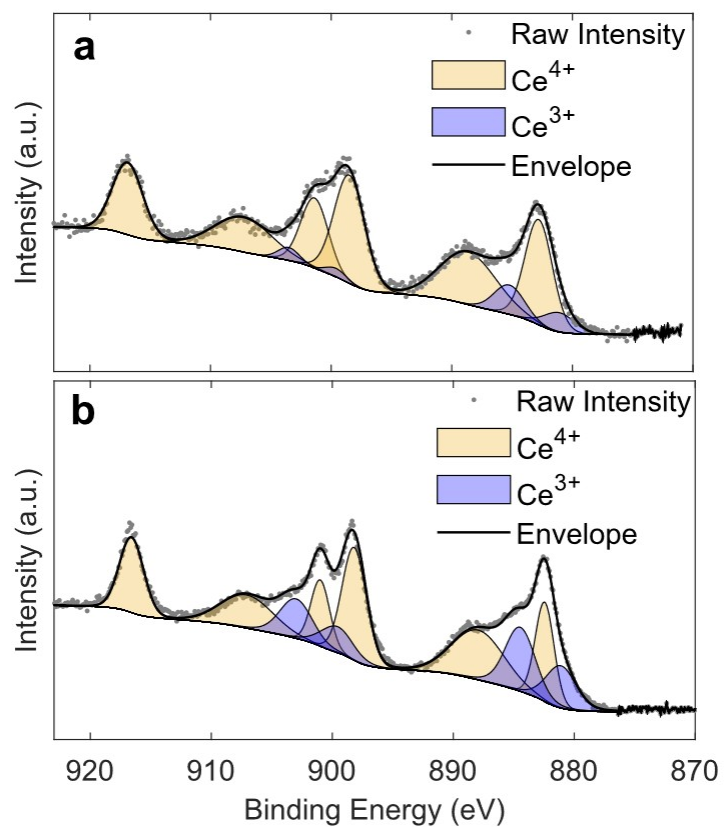

**Figure S 11.** Cerium 3d XPS region of (a) air calcined 104 nm IO and (b) argon annealed 104 nm IO.

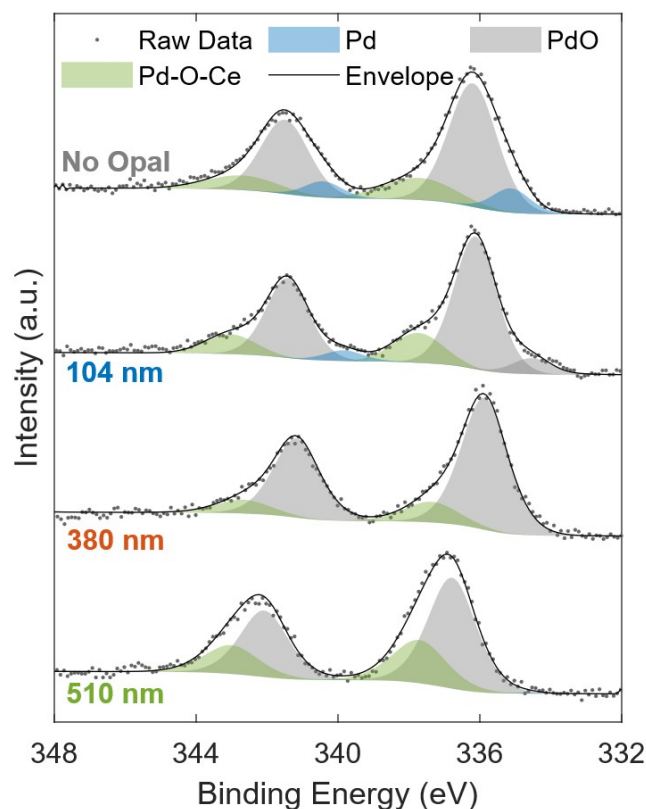

**Figure S 12.** Pd3d XPS region of (a) No opal, (b) 104nm, (c) 380 nm and (d) 510 nm Pd/CeO<sub>x</sub> calcined in air. A 10 wt% nominal Pd loading was utilized for all samples.

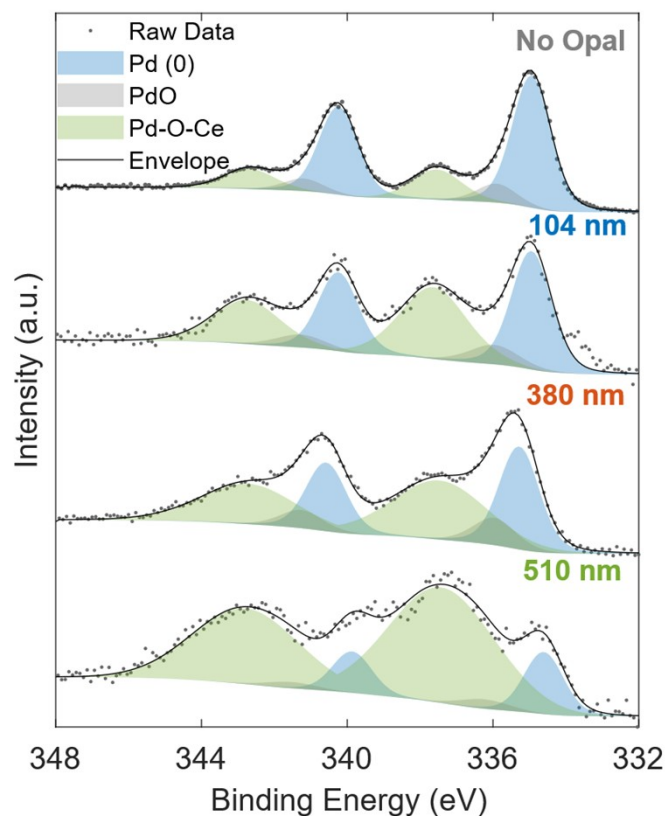

**Figure S 13.** Pd3d XPS region of (a) No opal, (b) 104nm, (c) 380 nm and (d) 510 nm Pd/CeO<sub>x</sub> annealed in argon atmosphere. A 10 wt% nominal Pd loading was utilized for all samples.

**Table S 4.** Surface composition, Pd3d peak positions and FWHM of air calcined Pd/CeO<sub>x</sub> from XPS measurement and analysis. A 10 wt% nominal Pd loading was utilized for all samples.

| Morphology | Pd Species | Percentage (%) | 3d <sub>5/2</sub> Position (eV) | 3d <sub>3/2</sub> Position (eV) | FWHM (eV) |
|------------|------------|----------------|---------------------------------|---------------------------------|-----------|
| No Opal    | Pd(0)      | 11.82          | 335.12                          | 340.42                          | 1.26      |
|            | PdO        | 69.23          | 336.20                          | 341.50                          | 1.60      |
|            | Pd-O-Ce    | 18.95          | 337.69                          | 342.70                          | 2.23      |
| 104 nm     | Pd(0)      | 9.00           | 334.54                          | 339.84                          | 1.30      |
|            | PdO        | 71.62          | 336.13                          | 341.43                          | 1.42      |
|            | Pd-O-Ce    | 19.38          | 337.74                          | 342.66                          | 1.68      |
| 380 nm     | Pd(0)      | -              | -                               | -                               | -         |
|            | PdO        | 83.91          | 335.89                          | 341.19                          | 1.53      |
|            | Pd-O-Ce    | 16.09          | 337.36                          | 342.04                          | 1.80      |
| 510 nm     | Pd(0)      | 0.46           | 334.65                          | 339.95                          | 0.91      |
|            | PdO        | 68.35          | 336.78                          | 342.08                          | 1.60      |
|            | Pd-O-Ce    | 31.19          | 337.71                          | 343.01                          | 1.80      |

**Table S 5.** Surface composition, Pd3d peak positions and FWHM of argon annealed Pd/CeO<sub>x</sub> from XPS measurement and analysis. A 10 wt% nominal Pd loading was utilized for all samples.

| Morphology | Pd Species | Percentage (%) | 3d <sub>5/2</sub> Position (eV) | 3d <sub>3/2</sub> Position (eV) | FWHM (eV) |
|------------|------------|----------------|---------------------------------|---------------------------------|-----------|
| No Opal    | Pd(0)      | 70.50          | 334.94                          | 340.24                          | 1.26      |
|            | PdO        | 9.96           | 335.90                          | 341.20                          | 1.30      |
|            | Pd-O-Ce    | 19.54          | 337.53                          | 342.68                          | 1.62      |
| 104 nm     | Pd(0)      | 41.24          | 334.94                          | 340.18                          | 1.20      |
|            | PdO        | 9.32           | 335.97                          | 341.27                          | 1.60      |
|            | Pd-O-Ce    | 49.45          | 337.63                          | 342.76                          | 2.17      |
| 380 nm     | Pd(0)      | 44.48          | 335.39                          | 340.69                          | 1.30      |
|            | PdO        | 4.64           | 335.97                          | 341.27                          | 1.60      |
|            | Pd-O-Ce    | 50.87          | 337.31                          | 342.61                          | 3.18      |
| 510 nm     | Pd(0)      | 17.29          | 334.63                          | 339.89                          | 1.30      |
|            | PdO        | 3.09           | 336.23                          | 341.53                          | 1.55      |
|            | Pd-O-Ce    | 79.62          | 337.42                          | 342.79                          | 3.43      |

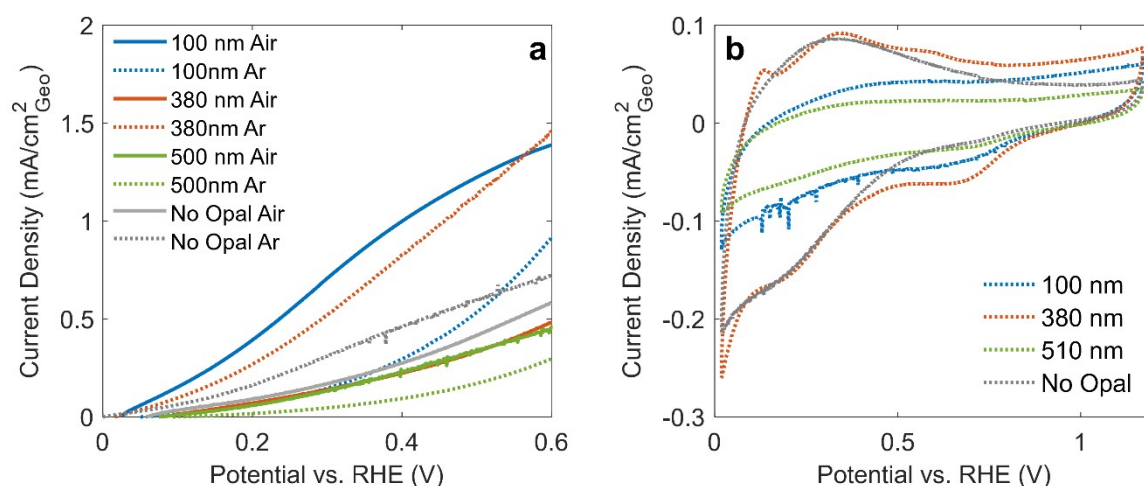

**Figure S 14.** (a) Anodic HOR sweeps of air calcined anodes (lines) and Ar annealed anodes (broken lines) recorded using a scan rate of 5mV/s at a RDE rotation speed of 1600 RPM under saturated H<sub>2</sub> atmosphere. (b) Cyclic voltammogram of anodes annealed in argon recorded at 100 mV/s under argon atmosphere. A 10 wt% nominal Pd loading was utilized for all samples.

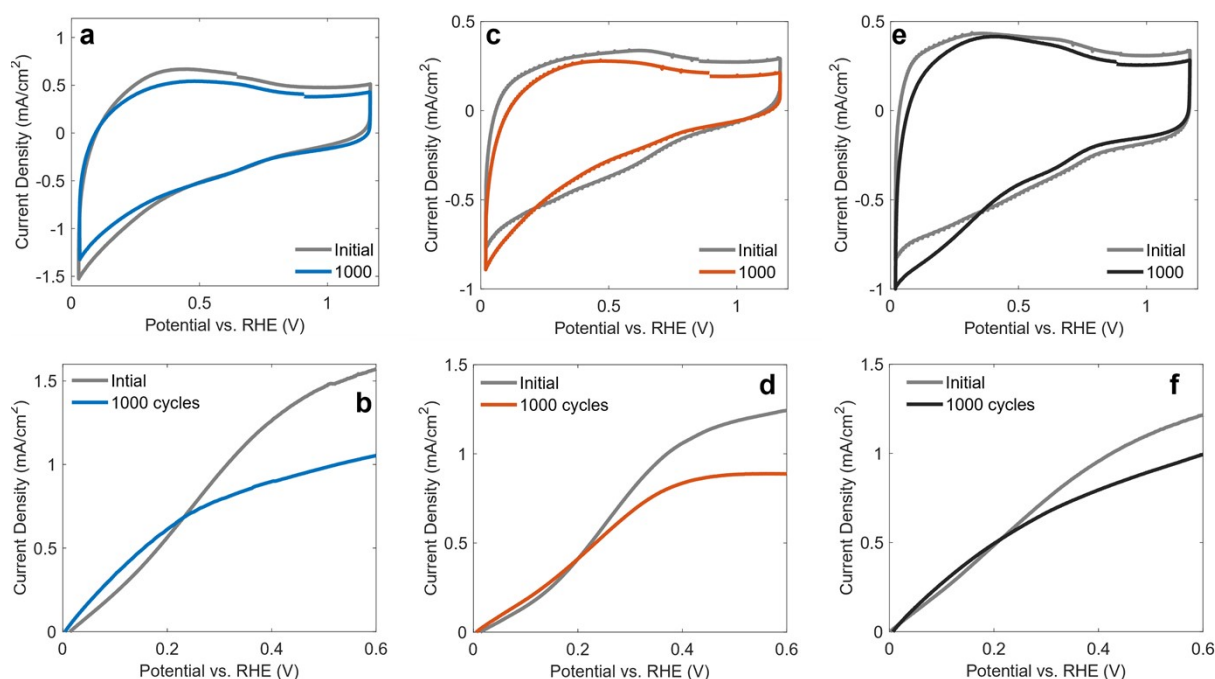

**Figure S 15.** Cyclic voltammograms (initial and 1000<sup>th</sup> cycle) and anodic HOR sweeps before potential cycling (initial) and after 1000<sup>th</sup> potential cycle for 104 nm (a-b), 380 nm (c-d) and no opal (e-f) Pd/CeO<sub>x</sub>.

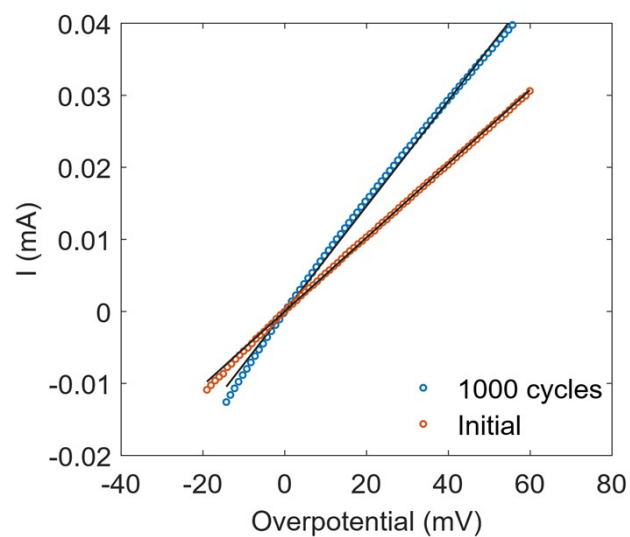

**Figure S 16.** HOR micropolarization region of 104 nm Pd/CeO<sub>x</sub> IOs before and after potential cycling.

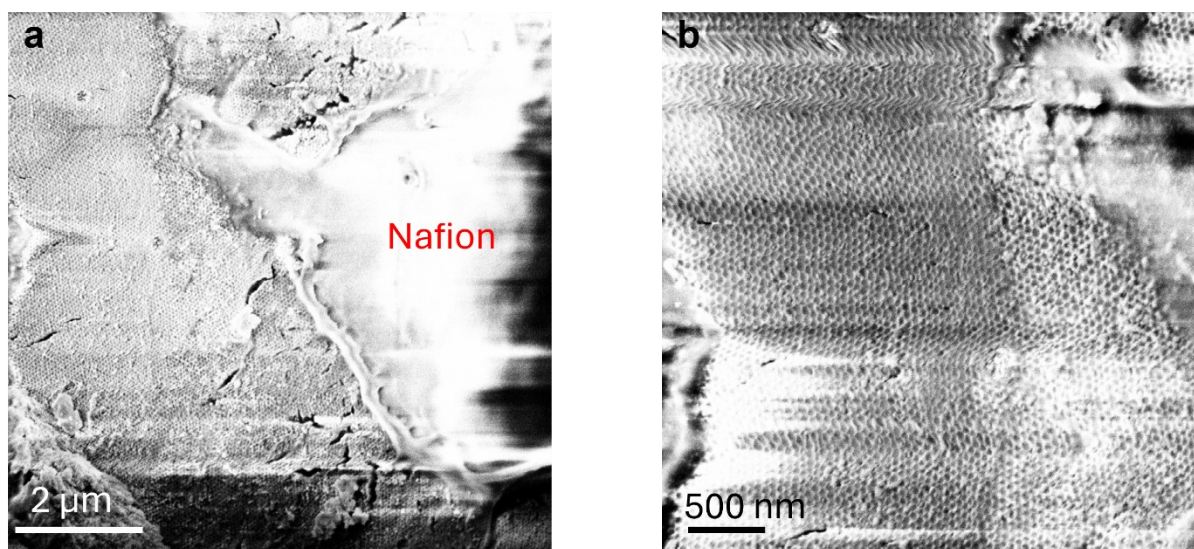

**Figure S 17.** SEM images of 104 nm Pd/CeO<sub>x</sub> IO after 1000 CV cycles clearly showing the preservation of the mesoporous structure. The smooth area and strong charging effects are due to nafion deposition before electrochemical testing.
